# Supplementary material
Source: MDPI journal article supplement (https://www.mdpi.com/2311-5521/8/11/298)
Supplement: s1 [file s1]

Archive with 3 entries (3 files):
- fluids-2658154-supplementary.pdf
- view1_30s.avi
- view2.avi
